# Supplementary material
Source: bioRxiv or medRxiv preprint supplement (https://www.biorxiv.org/highwire/filestream/119324/field_highwire_adjunct_files/3/393769-4.pdf)
Supplement: Supplementary file [file 393769-4.pdf]

| Component               | GO Category                                 | Genes                                 | Adjusted p-value |
|-------------------------|---------------------------------------------|---------------------------------------|------------------|
| 49N (Sertoli/Leydig)    | amyloid precursor protein metabolic process | Clu/Itm2b/App/Tmed10/Psen2/Apoe/Itm2c | 0.00072          |
| 26N (Leydig)            | amyloid-beta clearance                      | Clu/Ldlr/Igf1r/C3                     | 0.00771          |
| 16N (rare Sertoli-like) | response to amyloid-beta                    | Casp4/Lrp1/Igf1r/Fyn/Cacna2d1         | 0.00974          |

Table S3, related to Figure 6. GO Categories related to amyloid-beta metabolism show significant enrichment in components 49, 26 and 16. For each component we provide the component description, the GO category description, the genes from that category that were detected as a part of that component, as well as the multiple-test-corrected p-value corresponding to a test for enrichment.
